# Supplementary material for: Rhodium-calix[4]pyrrole and rhodium-tetraphenyl porphyrin: preparation, surface grafting and their catalytic application in nitro-benzene reduction
Source: Royal Society of Chemistry journal article supplement (doi:10.1039/c8dt02151a), 2018-01-01
Supplement: c8dt02151a1.pdf [file c8dt02151a1.pdf]

## Electronic Supplementary Information

# Rhodium-calix[4]pyrrole and Rhodium-tetraphenyl porphyrin: Preparation, surface grafting and its catalytic application on nitro-benzene reduction

K. Anjali,<sup>a</sup> M. Ahmed,<sup>b</sup> J. Christopher<sup>c</sup>. and A. Sakthivel,<sup>a\*</sup>

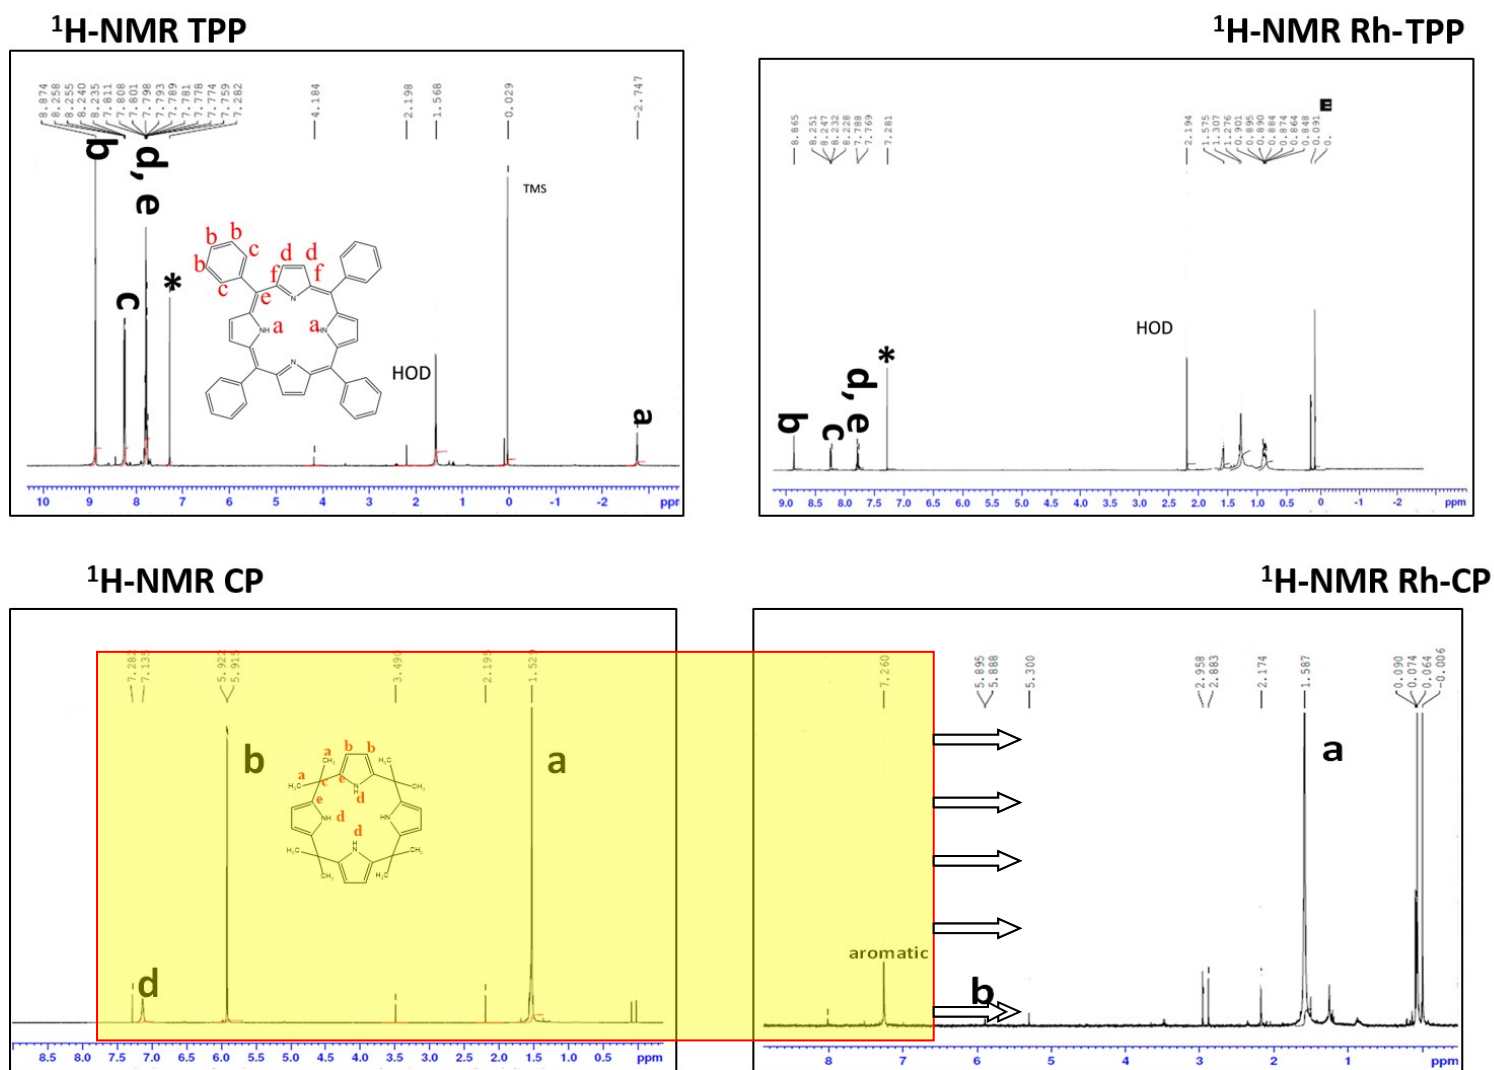

**Fig. S1.** <sup>1</sup>H NMR spectra of TPP, Rh-TPP, CP, Rh-CP

Document: CHNS Anjali (VarioMICRO) from: 05-12-2017 16:33:09

Name: eassuperuser, Access: VarioMICRO superuser

05-12-2017 11:3

varioMICRO V3.1.0 (f85d762)2013-04-26, CHNS Mode, Ser. No.: 15133023  
Elementar Analysensysteme GmbH

**Table S1. Snapshot of CHNS Analysis**

CP=Calix[4]pyrrole (7), TPP= Tetraphenyl porphyrin (8), Rh-TPP=Rhodium incorporated TPP (9), Rh-CP=Rhodium incorporated CP(10), Rh-CP-SBA-15-F= Rh-CP grafted on diamino functionalised SBA-15 (11), Rh-TPP-SBA-15-F== Rh-TPP grafted on diamino functionalised SBA-15 (12)

| Document: CHNS Riya & Nishana8.3.2018- aft fact (VarioMICRO) from: 08-03-2018 15:26:44                                                                                                                                                   |          |                  |       |              |       |        |                   |                                                                                                                                                                                                  |                                                                 |
|------------------------------------------------------------------------------------------------------------------------------------------------------------------------------------------------------------------------------------------|----------|------------------|-------|--------------|-------|--------|-------------------|--------------------------------------------------------------------------------------------------------------------------------------------------------------------------------------------------|-----------------------------------------------------------------|
|  <p>Your complimentary use period has ended. Thank you for using PDF Complete.</p> <p>Click Here to upgrade to Unlimited Pages and Expanded Features</p> |          |                  |       | of Chemistry |       |        |                   |                                                                                                                                                                                                  |                                                                 |
| No.                                                                                                                                                                                                                                      | Weight.. | Name             | N [%] | C [%]        | H [%] | S [%]  | Date Time         | Name: eassuperuser, Access: VarioMICRO superuser 08-03-2018 09:32:01<br>varioMICRO V3.1.0 (f85d762) 2013-04-26, CHNS Mode, Ser. No.: 15133023<br>Elementar Analysensysteme GmbH<br>Page 1 (of 1) |                                                                 |
| 1                                                                                                                                                                                                                                        | 1.0000   | Blank            | 0.00  | 0.00         | 0.000 | 0.000  | 08.03.2018 10:... |                                                                                                                                                                                                  |                                                                 |
| 2                                                                                                                                                                                                                                        | 1.0000   | Blank            | 0.00  | 0.00         | 0.000 | 0.000  | 08.03.2018 11:... |                                                                                                                                                                                                  |                                                                 |
| 3                                                                                                                                                                                                                                        | 1.0000   | Blank            | 0.00  | 0.00         | 0.000 | 0.000  | 08.03.2018 11:... |                                                                                                                                                                                                  |                                                                 |
| 4                                                                                                                                                                                                                                        | 5.0000   | Runin            | 14.77 | 37.79        | 3.761 | 16.224 | 08.03.2018 11:... |                                                                                                                                                                                                  |                                                                 |
| 5                                                                                                                                                                                                                                        | 4.8020   | Runin            | 14.80 | 37.85        | 3.820 | 16.526 | 08.03.2018 11:... |                                                                                                                                                                                                  |                                                                 |
| 6                                                                                                                                                                                                                                        | 2.3400   | sulfanilamide    | 16.26 | 41.85        | 4.690 | 18.620 | 08.03.2018 11:... |                                                                                                                                                                                                  |                                                                 |
| 7                                                                                                                                                                                                                                        | 2.5840   | sulfanilamide    | 16.26 | 41.85        | 4.690 | 18.620 | 08.03.2018 11:... |                                                                                                                                                                                                  |                                                                 |
| 8                                                                                                                                                                                                                                        | 2.9500   | TPP              | 9.17  | 85.35        | 4.987 | 0.000  | 08.03.2018 12:... |                                                                                                                                                                                                  | → Tetraphenyl porhyri                                           |
| 9                                                                                                                                                                                                                                        | 2.4650   | CP               | 13.03 | 78.83        | 5.80  | 0.000  | 08.03.2018 12:... |                                                                                                                                                                                                  | → Calix[4]pyrrole                                               |
| 10                                                                                                                                                                                                                                       | 3.7320   | Rh-CP            | 9.95  | 59.95        | 5.80  | 0.000  | 08.03.2018 12:... |                                                                                                                                                                                                  | → Rh incorporated CP                                            |
| 11                                                                                                                                                                                                                                       | 3.0800   | Rh-CP-SBA-15-F   | 6.46  | 60.95        | 3.435 | 0.000  | 08.03.2018 12:... |                                                                                                                                                                                                  | → Rh-CP grafted on diamino functionalised SBA-15                |
| 12                                                                                                                                                                                                                                       | 2.1180   | Rh-TPP-SBA-15-F  | 5.77  | 60.72        | 4.171 | 0.000  | 08.03.2018 12:... |                                                                                                                                                                                                  | → Rh-TPP grafted on diamino functionalised SBA-15               |
| 13                                                                                                                                                                                                                                       | 2.2080   | Rh-CP-SBA-15-F*  | 5.04  | 60.35        | 3.152 | 0.000  | 08.03.2018 13:... |                                                                                                                                                                                                  | → Rh-CP grafted on diamino functionalised SBA-15 after reaction |
| 14                                                                                                                                                                                                                                       | 3.0840   | Rh-TPP-SBA-15-F* | 5.77  | 60.24        | 2.719 | 0.000  | 08.03.2018 13:... |                                                                                                                                                                                                  | → Rh-CP grafted on diamino functionalised SBA-15 after reaction |
| 15                                                                                                                                                                                                                                       | 2.3980   | Rh TPP           | 7.50  | 70.67        | 4.10  | 0.000  | 08.03.2018 13:... |                                                                                                                                                                                                  |                                                                 |
| 16                                                                                                                                                                                                                                       | 1.8570   | RCo 2            | 0.06  | 0.46         | 3.956 | 11.774 | 08.03.2018 13:... |                                                                                                                                                                                                  |                                                                 |

**Table S2. Snapshot of CHNS Analysis**

TPP= Tetraphenyl porphyrin (8), CP=Calix[4]pyrrole (9), Rh-CP=Rhodium incorporated CP(10), Rh-CP-SBA-15-F= Rh-CP grafted on diamino functionalised SBA-15 (11), Rh-TPP-SBA-15-F= Rh-TPP grafted on diamino functionalised SBA-15 (12), Rh-CP-SBA-15-F\*= Rh-CP grafted on diamino functionalised SBA-15 after catalytic reaction (13), Rh-TPP-SBA-15-F\*= Rh-TPP grafted on diamino functionalised SBA-15 after catalytic reaction (14) Rh-TPP=Rhodium incorporated TPP (15)

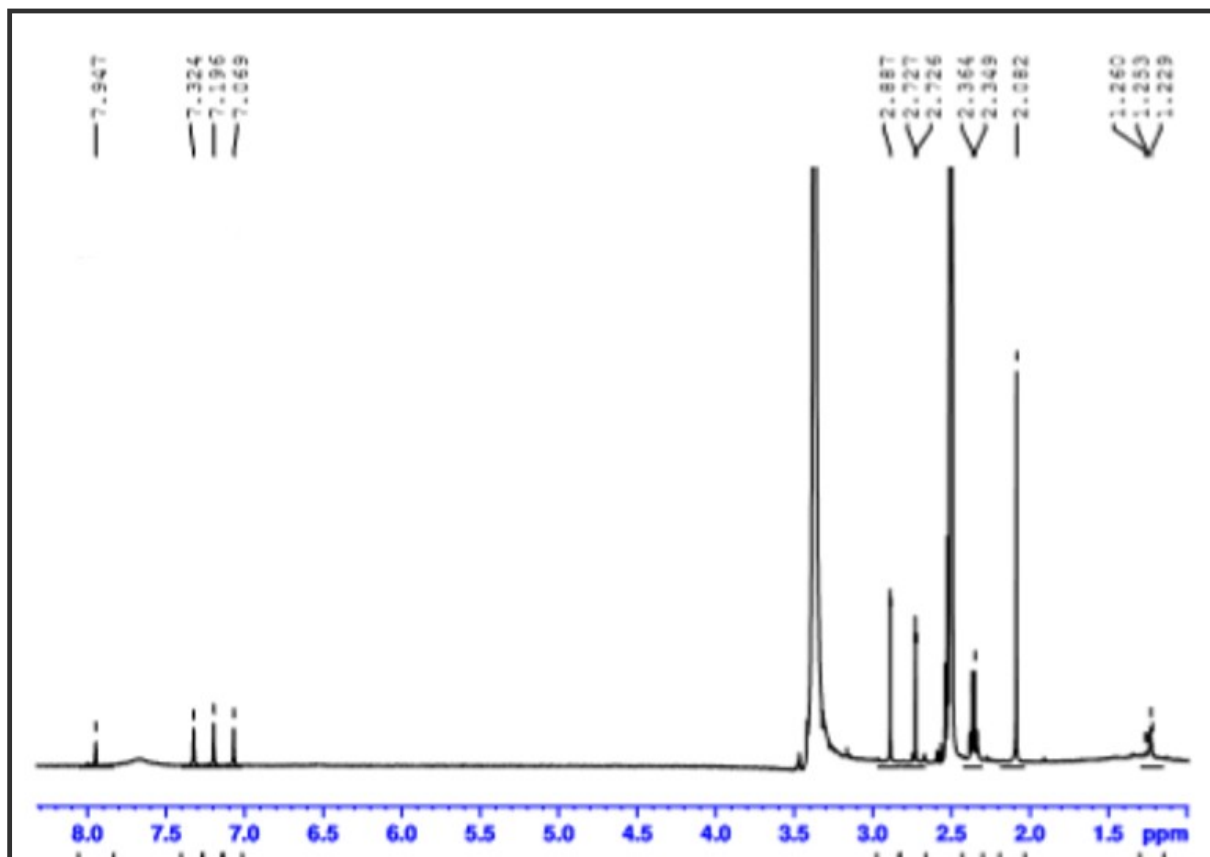

**Fig S2.**  $^1\text{H}$  NMR of poly-pyrrole formed during the preparation of Calix[4]pyrrole and Tetraphenyl porphyrin under normal atmospheric condition.

Table S3. Comparative study of existing reported catalytic system.

| Sl. No | Catalyst                                      | Nitroarene            | Conv. (%) | Sel. (%) | Reaction condition                                            | Ref.         |
|--------|-----------------------------------------------|-----------------------|-----------|----------|---------------------------------------------------------------|--------------|
| 1      | SBA-15-F-RhCP<br>SBA-15-F-RhTPP               | Aromatic nitrobenzene | >95       | >90      | Hydrazine, isopropyl alcohol, 80 °C;                          | Present work |
| 2      | CoNC                                          | Nitrotriptycene       | 95        | 95       | NaBH <sub>4</sub> , DCM, RT.                                  | 16d          |
| 3      | Au-Organic-inorganic hybride SiO <sub>2</sub> | Aromatic Nitrobenzene | >90       | >90      | 40 atm H <sub>2</sub> pressure, EtOH, 100-140 °C              | 23a          |
| 4      | Ru-Reduced graphine oxide                     | Aromatic Nitrobenzene | 60-100    | 90-99    | 20 atm H <sub>2</sub> Pressure, EtOH-H <sub>2</sub> O, 110 °C | 23b          |

---

|   |                                                              |                       |       |     |                                          |     |
|---|--------------------------------------------------------------|-----------------------|-------|-----|------------------------------------------|-----|
| 5 | FeSO <sub>4</sub> -Fe phthalocyanine                         | Aromatic nitrobenzene | 60-99 | 82  | Hydrazene, EtOH-H <sub>2</sub> O, 120 °C | 23c |
| 6 | Zn-Phthalocyanin                                             | Aromatic nitrobenzene | 80-99 | 99  | Hydrazene, PEG-4000, 100 °C              | 23d |
| 7 | Pinacol, MoO <sub>2</sub> Cl <sub>2</sub> (dmf) <sub>2</sub> | Aromatic nitrobenzene | 95    | 94  | Toluene, 150 °C                          | 23e |
| 8 | Fe(acac) <sub>3</sub>                                        | Aromatic nitrobenzene | 99    | >90 | MW, 150 °C                               | 23f |

---
